# Supplementary material
Source: Elsevier journal article supplement (https://www.sciencedirect.com/science/article/pii/S1665268119300523)
Supplement: mmc1 [file S1665268119300523:mmc1.docx]

**Supplemental Table 1. ICD 9/10 codes for data extraction.**

| **Diagnosis** | **ICD 9** | **ICD 10** |
| --- | --- | --- |
| Hepatitis C | 070.41, 070.44, 070.51, 070.54, 070.70, 070.71, V02.62 | B17.10, B17.11, B17.8, B18.2, B19.20, B19.21, B19.9, Z22.52 |
| Cirrhosis | 571.2, 571.5, 571.6 | K70.3x, K70.4x, K72.x, K74.3, K74.4, K74.5, K74.6x |
| Diabetes mellitus | 250.x | E10.x, E11.x |
| Chronic kidney disease | 585.9, 585.1, 585.2, 585.3, 585.4, 585.5 | N18.1, N18.2, N18.3, N18.4, N18.5, N18.9 |
| End-stage renal disease on hemodialysis | 585.6, V45.11 | N18.6, Z99.2 |
| Human immunodeficiency virus infection | 042 | B20 |
